# Supplementary material for: Ground beetle assemblages inhabiting various age classes of Norway spruce stands in north-eastern Poland
Source: PeerJ. 2023 Dec 1;11:e16502. doi: 10.7717/peerj.16502 (PMC10695117; doi:10.7717/peerj.16502)
Supplement: Supplemental Information 1 [file peerj-11-16502-s001.xlsx]

## Sheet: species
		A_bifr	A_bru	A_com	A_simi	Ba_lace	Ca_amb	Ca_err	Ca_fusc	Ca_mela	Ca_micr	C_arv	C_canc	C_conv	C_coria	C_glab	C_gran	C_hort	C_marg	C_nemo	C_viol	Cl_fos	Cy_cara	H_leav	H_rufipe	H_tar	L_ferr	L_rufo	L_term	Li_ass	Lo_pili	N_brev	No_big	No_pal	Op_rufi	Ox_ob	Pa_atr	Po_lep	Po_ver	P_anth	P_mela	P_nige	P_obl	P_str	P_ver	Sy_tru
C_1_1	C1										1							11		2				1								5									2		13
C_1_2	C1									3	1	3	2					53		4	2		4	1									1								4	5	6
C_1_3	C1										4							7			1		3					2				3									10	1	4
C_1_4	C1		1								5							19		2				1						3									2		6		13
C_1_5	C1										2		1					45		2	2		2	4																		5	2
C_2_1	C2		1							1	1					2		37		4	2									5											4	2	4
C_2_2	C2					1				5	3							18		6									1	2											9	6	5
C_2_3	C2		1															11		4			1	2																	4	1	9
C_2_4	C2																	8																					1		2		2
C_2_5	C2		1								2					2		20		4	4			1																		2
C_3_1	C3										2							11			1									6											3
C_3_2	C3												1			3		18		4	1		2																		6	4	2
C_3_3	C3		1							2	2							40		2	3			1															1			2	2
C_3_4	C3										4					2	2	12		2	1			2						2			1						2		2	6	11
C_3_5	C3										1		1			1		13						1																	4	3	7
C_4_1	C4		1							2	1						2	19						2																	4	2	2
C_4_2	C4										2		1					18		3	5			1					1	1											6	6
C_4_3	C4									5	1						1	11		2	2																		1		10	2	5
C_4_4	C4																	25		3	2			1															1		4	2	1
C_4_5	C4									4	4							5		3																			1		1	2	2
B_1_1	B1												2					9		5		1								2											6	6	3
B_1_2	B1																	14		2																					6	12	3
B_1_3	B1																1	48		3			1																	1	5	15	3
B_1_4	B1					1												14		3			1							1												12	1
B_1_5	B1												2					42		1				1						3											2	13	3
B_2_1	B2					1							1				1	12		3			1							1											12	5	13
B_2_2	B2																	16		1										1									1		2	3	8
B_2_3	B2										1		4				2	39		5			1							1											5	8	5
B_2_4	B2										1							27		3			2	1						1			2								11	9	8
B_2_5	B2												3					15		9			2	1																	6	4	5
B_1_1	B3																	6	4	2												3							1		9	15	9
B_1_2	B3										1							10		2						1						4		1							8	7	5
B_1_3	B3										1							8	1	3					1							4		1							12	22	6
B_1_4	B3										2							11		1					1				1			5	1	1							5	7	7
B_1_5	B3								1		1							11		2				2								7		1							11	11	6
B_2_1	B4										2							5		1	1			1								3		1							11	10	13
B_2_2	B4								2		1							4		3	2											6		2							11	24	8	1
B_2_3	B4										2							8		2	2			1		1						11		1					1		25	22	8
B_2_4	B4										3							12		4	2				1							10	1								16	18	5
B_2_5	B4										1				1	1	1	33		3	4			1								2				1					10	39	3	1
A_1_1	A1			1			1		6	1	19	9		2				15	1						1	1							2									7	12
A_1_2	A1							1	2		22	14	1					19		1	2				1	2							2									12	10
A_1_3	A1	1	1						1		20	9		2				12	1						2								3									16	16
A_1_4	A1								3		17	9	2	1		2	1	11			2												1					1				10	12
A_1_5	A1								1		25	12				1		7			3												4									7	7
A_2_1	A2								1		15	11		2				12			1						1													1		4	10			1
A_2_2	A2		1		1			1	2	1	18	11		2				10			1			1			1						2					1	1			8	20
A_2_3	A2	1							5		16	1		1				13															1					1				7	5
A_2_4	A2								2	1	13	5		1				10															1	1								6	11
A_2_5	A2		2						3		16	8		1				9			1												2									9	6
A_1_1	A3												2					21		5			1							2					1	1	1				3	6
A_1_2	A3												2				2	34		4			1									1									3	5	2
A_1_3	A3																1	22		1									1	1							1				2	5	4
A_1_4	A3																1	14					2	1						2	1											9	1
A_1_5	A3																	10		2			1	1						2							1				1	2	4		1
A_2_1	A4												2				1	15		1			2	1													1				6	6	5
A_2_2	A4												5					11		3			2							1											7	8	8
A_2_3	A4												2				3	33		1			1							1											1	3	7
A_2_4	A4												1				1	21		2			1	1																	2	7	1
A_2_5	A4												4				3	34					1	1						2											5	15	6

## Sheet: traps
Trap	Combination		Individuals	Species
C_1_1	C	C1	7	3
C_1_1	C	C1	5	1
C_1_1	C	C1	7	1
C_1_1	C	C1	2	1
C_1_1	C	C1	1	1
C_1_1	C	C1	2	1
C_1_1	C	C1	0	0
C_1_1	C	C1	0	0
C_1_1	C	C1	0	0
C_1_1	C	C1	0	0
C_1_1	C	C1	11	2
C_1_2	C	C1	10	4
C_1_2	C	C1	8	3
C_1_2	C	C1	6	2
C_1_2	C	C1	4	2
C_1_2	C	C1	2	2
C_1_2	C	C1	4	2
C_1_2	C	C1	2	1
C_1_2	C	C1	6	3
C_1_2	C	C1	8	4
C_1_2	C	C1	19	4
C_1_2	C	C1	20	1
C_1_3	C	C1	4	2
C_1_3	C	C1	3	1
C_1_3	C	C1	4	1
C_1_3	C	C1	0	0
C_1_3	C	C1	1	1
C_1_3	C	C1	1	1
C_1_3	C	C1	10	4
C_1_3	C	C1	5	2
C_1_3	C	C1	4	3
C_1_3	C	C1	3	1
C_1_3	C	C1	0	0
C_1_4	C	C1	6	3
C_1_4	C	C1	11	4
C_1_4	C	C1	2	1
C_1_4	C	C1	1	1
C_1_4	C	C1	3	2
C_1_4	C	C1	12	4
C_1_4	C	C1	1	1
C_1_4	C	C1	0	0
C_1_4	C	C1	1	1
C_1_4	C	C1	4	2
C_1_4	C	C1	11	1
C_1_5	C	C1	3	2
C_1_5	C	C1	2	1
C_1_5	C	C1	4	2
C_1_5	C	C1	1	1
C_1_5	C	C1	1	1
C_1_5	C	C1	13	3
C_1_5	C	C1	8	4
C_1_5	C	C1	6	2
C_1_5	C	C1	1	1
C_1_5	C	C1	4	1
C_1_5	C	C1	22	1
C_2_1	C	C2	2	1
C_2_1	C	C2	7	3
C_2_1	C	C2	1	1
C_2_1	C	C2	1	1
C_2_1	C	C2	7	3
C_2_1	C	C2	11	4
C_2_1	C	C2	6	2
C_2_1	C	C2	7	2
C_2_1	C	C2	1	1
C_2_1	C	C2	2	1
C_2_1	C	C2	18	3
C_2_2	C	C2	2	1
C_2_2	C	C2	4	2
C_2_2	C	C2	0	0
C_2_2	C	C2	2	2
C_2_2	C	C2	3	2
C_2_2	C	C2	18	5
C_2_2	C	C2	4	2
C_2_2	C	C2	11	4
C_2_2	C	C2	0	0
C_2_2	C	C2	8	3
C_2_2	C	C2	4	1
C_2_3	C	C2	2	1
C_2_3	C	C2	2	1
C_2_3	C	C2	1	1
C_2_3	C	C2	1	1
C_2_3	C	C2	3	2
C_2_3	C	C2	11	3
C_2_3	C	C2	1	1
C_2_3	C	C2	2	1
C_2_3	C	C2	0	0
C_2_3	C	C2	7	2
C_2_3	C	C2	3	1
C_2_4	C	C2	1	1
C_2_4	C	C2	0	0
C_2_4	C	C2	0	0
C_2_4	C	C2	0	0
C_2_4	C	C2	0	0
C_2_4	C	C2	4	2
C_2_4	C	C2	2	1
C_2_4	C	C2	0	0
C_2_4	C	C2	2	1
C_2_4	C	C2	0	0
C_2_4	C	C2	4	2
C_2_5	C	C2	8	2
C_2_5	C	C2	1	1
C_2_5	C	C2	2	1
C_2_5	C	C2	1	1
C_2_5	C	C2	1	1
C_2_5	C	C2	0	0
C_2_5	C	C2	2	1
C_2_5	C	C2	4	2
C_2_5	C	C2	6	2
C_2_5	C	C2	2	1
C_2_5	C	C2	9	1
C_3_1	C	C3	7	2
C_3_1	C	C3	4	1
C_3_1	C	C3	3	1
C_3_1	C	C3	0	0
C_3_1	C	C3	0	0
C_3_1	C	C3	1	1
C_3_1	C	C3	2	1
C_3_1	C	C3	0	0
C_3_1	C	C3	2	1
C_3_1	C	C3	0	0
C_3_1	C	C3	4	1
C_3_2	C	C3	5	2
C_3_2	C	C3	5	3
C_3_2	C	C3	2	1
C_3_2	C	C3	0	0
C_3_2	C	C3	2	2
C_3_2	C	C3	3	2
C_3_2	C	C3	10	4
C_3_2	C	C3	0	0
C_3_2	C	C3	4	2
C_3_2	C	C3	6	2
C_3_2	C	C3	4	1
C_3_3	C	C3	6	2
C_3_3	C	C3	5	2
C_3_3	C	C3	7	2
C_3_3	C	C3	3	2
C_3_3	C	C3	1	1
C_3_3	C	C3	6	2
C_3_3	C	C3	8	2
C_3_3	C	C3	4	2
C_3_3	C	C3	0	0
C_3_3	C	C3	8	2
C_3_3	C	C3	8	1
C_3_4	C	C3	4	2
C_3_4	C	C3	5	2
C_3_4	C	C3	7	3
C_3_4	C	C3	5	3
C_3_4	C	C3	2	1
C_3_4	C	C3	8	5
C_3_4	C	C3	6	2
C_3_4	C	C3	10	4
C_3_4	C	C3	0	0
C_3_4	C	C3	0	0
C_3_4	C	C3	2	1
C_3_5	C	C3	4	3
C_3_5	C	C3	3	1
C_3_5	C	C3	0	0
C_3_5	C	C3	1	1
C_3_5	C	C3	6	3
C_3_5	C	C3	4	2
C_3_5	C	C3	2	1
C_3_5	C	C3	7	2
C_3_5	C	C3	0	0
C_3_5	C	C3	4	1
C_3_5	C	C3	0	0
C_4_1	C	C4	6	2
C_4_1	C	C4	5	3
C_4_1	C	C4	1	1
C_4_1	C	C4	1	1
C_4_1	C	C4	6	3
C_4_1	C	C4	0	0
C_4_1	C	C4	6	3
C_4_1	C	C4	0	0
C_4_1	C	C4	2	1
C_4_1	C	C4	4	1
C_4_1	C	C4	4	1
C_4_2	C	C4	7	3
C_4_2	C	C4	4	1
C_4_2	C	C4	1	1
C_4_2	C	C4	5	2
C_4_2	C	C4	0	0
C_4_2	C	C4	2	2
C_4_2	C	C4	7	4
C_4_2	C	C4	4	1
C_4_2	C	C4	2	1
C_4_2	C	C4	10	3
C_4_2	C	C4	2	1
C_4_3	C	C4	8	2
C_4_3	C	C4	4	2
C_4_3	C	C4	1	1
C_4_3	C	C4	1	1
C_4_3	C	C4	5	2
C_4_3	C	C4	4	2
C_4_3	C	C4	0	0
C_4_3	C	C4	8	4
C_4_3	C	C4	7	2
C_4_3	C	C4	2	1
C_4_3	C	C4	0	0
C_4_4	C	C4	8	3
C_4_4	C	C4	4	1
C_4_4	C	C4	4	3
C_4_4	C	C4	0	0
C_4_4	C	C4	1	1
C_4_4	C	C4	2	1
C_4_4	C	C4	2	1
C_4_4	C	C4	3	1
C_4_4	C	C4	8	2
C_4_4	C	C4	0	0
C_4_4	C	C4	7	1
C_4_5	C	C4	1	1
C_4_5	C	C4	6	2
C_4_5	C	C4	0	0
C_4_5	C	C4	2	2
C_4_5	C	C4	1	1
C_4_5	C	C4	0	0
C_4_5	C	C4	6	2
C_4_5	C	C4	2	1
C_4_5	C	C4	4	1
C_4_5	C	C4	0	0
C_4_5	C	C4	0	0
B_1_1	B	B1	2	2
B_1_1	B	B1	3	3
B_1_1	B	B1	8	3
B_1_1	B	B1	2	2
B_1_1	B	B1	0	0
B_1_1	B	B1	2	1
B_1_1	B	B1	1	1
B_1_1	B	B1	7	2
B_1_1	B	B1	7	4
B_1_1	B	B1	0	0
B_1_1	B	B1	2	1
B_1_2	B	B1	2	2
B_1_2	B	B1	8	3
B_1_2	B	B1	0	0
B_1_2	B	B1	0	0
B_1_2	B	B1	1	1
B_1_2	B	B1	3	3
B_1_2	B	B1	6	2
B_1_2	B	B1	7	2
B_1_2	B	B1	4	3
B_1_2	B	B1	4	2
B_1_2	B	B1	2	2
B_1_3	B	B1	4	3
B_1_3	B	B1	4	3
B_1_3	B	B1	11	4
B_1_3	B	B1	2	2
B_1_3	B	B1	0	0
B_1_3	B	B1	1	1
B_1_3	B	B1	5	3
B_1_3	B	B1	22	3
B_1_3	B	B1	21	1
B_1_3	B	B1	3	3
B_1_3	B	B1	4	2
B_1_4	B	B1	0	0
B_1_4	B	B1	5	3
B_1_4	B	B1	1	1
B_1_4	B	B1	1	1
B_1_4	B	B1	3	2
B_1_4	B	B1	3	2
B_1_4	B	B1	3	1
B_1_4	B	B1	8	3
B_1_4	B	B1	6	3
B_1_4	B	B1	3	1
B_1_4	B	B1	0	0
B_1_5	B	B1	0	0
B_1_5	B	B1	3	3
B_1_5	B	B1	7	2
B_1_5	B	B1	4	3
B_1_5	B	B1	2	1
B_1_5	B	B1	7	5
B_1_5	B	B1	7	2
B_1_5	B	B1	6	2
B_1_5	B	B1	16	2
B_1_5	B	B1	6	4
B_1_5	B	B1	9	2
B_2_1	B	B2	10	2
B_2_1	B	B2	4	3
B_2_1	B	B2	8	4
B_2_1	B	B2	1	1
B_2_1	B	B2	3	3
B_2_1	B	B2	1	1
B_2_1	B	B2	6	2
B_2_1	B	B2	4	2
B_2_1	B	B2	3	2
B_2_1	B	B2	5	3
B_2_1	B	B2	5	2
B_2_2	B	B2	8	4
B_2_2	B	B2	2	1
B_2_2	B	B2	5	2
B_2_2	B	B2	3	3
B_2_2	B	B2	4	4
B_2_2	B	B2	2	2
B_2_2	B	B2	3	1
B_2_2	B	B2	0	0
B_2_2	B	B2	2	1
B_2_2	B	B2	3	2
B_2_2	B	B2	0	0
B_2_3	B	B2	2	2
B_2_3	B	B2	12	3
B_2_3	B	B2	10	5
B_2_3	B	B2	3	2
B_2_3	B	B2	3	3
B_2_3	B	B2	7	5
B_2_3	B	B2	10	5
B_2_3	B	B2	5	3
B_2_3	B	B2	13	4
B_2_3	B	B2	3	2
B_2_3	B	B2	3	1
B_2_4	B	B2	7	3
B_2_4	B	B2	3	3
B_2_4	B	B2	7	5
B_2_4	B	B2	8	6
B_2_4	B	B2	9	6
B_2_4	B	B2	3	2
B_2_4	B	B2	5	3
B_2_4	B	B2	7	3
B_2_4	B	B2	7	3
B_2_4	B	B2	5	2
B_2_4	B	B2	4	1
B_2_5	B	B2	2	1
B_2_5	B	B2	3	3
B_2_5	B	B2	8	5
B_2_5	B	B2	6	3
B_2_5	B	B2	4	4
B_2_5	B	B2	4	2
B_2_5	B	B2	3	2
B_2_5	B	B2	7	2
B_2_5	B	B2	2	2
B_2_5	B	B2	2	2
B_2_5	B	B2	4	3
B_1_1	B	B3	5	2
B_1_1	B	B3	4	3
B_1_1	B	B3	0	0
B_1_1	B	B3	2	2
B_1_1	B	B3	2	2
B_1_1	B	B3	10	5
B_1_1	B	B3	12	3
B_1_1	B	B3	3	2
B_1_1	B	B3	4	2
B_1_1	B	B3	5	3
B_1_1	B	B3	2	2
B_1_2	B	B3	0	0
B_1_2	B	B3	3	2
B_1_2	B	B3	5	3
B_1_2	B	B3	2	1
B_1_2	B	B3	2	1
B_1_2	B	B3	3	2
B_1_2	B	B3	5	3
B_1_2	B	B3	2	2
B_1_2	B	B3	7	3
B_1_2	B	B3	8	3
B_1_2	B	B3	2	1
B_1_3	B	B3	0	0
B_1_3	B	B3	3	2
B_1_3	B	B3	6	4
B_1_3	B	B3	2	1
B_1_3	B	B3	3	2
B_1_3	B	B3	9	4
B_1_3	B	B3	19	6
B_1_3	B	B3	5	2
B_1_3	B	B3	9	3
B_1_3	B	B3	0	0
B_1_3	B	B3	3	1
B_1_4	B	B3	1	1
B_1_4	B	B3	6	4
B_1_4	B	B3	4	3
B_1_4	B	B3	0	0
B_1_4	B	B3	5	4
B_1_4	B	B3	3	2
B_1_4	B	B3	3	2
B_1_4	B	B3	7	4
B_1_4	B	B3	4	4
B_1_4	B	B3	8	2
B_1_4	B	B3	1	1
B_1_5	B	B3	5	3
B_1_5	B	B3	3	3
B_1_5	B	B3	6	3
B_1_5	B	B3	6	3
B_1_5	B	B3	5	1
B_1_5	B	B3	3	3
B_1_5	B	B3	11	5
B_1_5	B	B3	1	1
B_1_5	B	B3	5	4
B_1_5	B	B3	4	3
B_1_5	B	B3	4	1
B_2_1	B	B4	4	1
B_2_1	B	B4	6	3
B_2_1	B	B4	9	3
B_2_1	B	B4	5	2
B_2_1	B	B4	3	3
B_2_1	B	B4	0	0
B_2_1	B	B4	7	6
B_2_1	B	B4	8	4
B_2_1	B	B4	2	2
B_2_1	B	B4	4	3
B_2_1	B	B4	0	0
B_2_2	B	B4	5	3
B_2_2	B	B4	6	3
B_2_2	B	B4	3	2
B_2_2	B	B4	2	2
B_2_2	B	B4	4	3
B_2_2	B	B4	4	2
B_2_2	B	B4	21	6
B_2_2	B	B4	6	2
B_2_2	B	B4	9	3
B_2_2	B	B4	0	0
B_2_2	B	B4	4	2
B_2_3	B	B4	13	7
B_2_3	B	B4	1	1
B_2_3	B	B4	2	2
B_2_3	B	B4	0	0
B_2_3	B	B4	4	2
B_2_3	B	B4	16	4
B_2_3	B	B4	9	2
B_2_3	B	B4	14	3
B_2_3	B	B4	13	4
B_2_3	B	B4	4	3
B_2_3	B	B4	8	3
B_2_4	B	B4	0	0
B_2_4	B	B4	6	2
B_2_4	B	B4	2	2
B_2_4	B	B4	1	1
B_2_4	B	B4	9	4
B_2_4	B	B4	21	7
B_2_4	B	B4	5	2
B_2_4	B	B4	10	3
B_2_4	B	B4	7	3
B_2_4	B	B4	8	3
B_2_4	B	B4	3	2
B_2_5	B	B4	3	3
B_2_5	B	B4	4	4
B_2_5	B	B4	6	3
B_2_5	B	B4	8	3
B_2_5	B	B4	7	4
B_2_5	B	B4	22	5
B_2_5	B	B4	14	5
B_2_5	B	B4	9	1
B_2_5	B	B4	8	3
B_2_5	B	B4	15	4
B_2_5	B	B4	5	3
A_1_1	A	A1	17	8
A_1_1	A	A1	10	4
A_1_1	A	A1	9	6
A_1_1	A	A1	7	5
A_1_1	A	A1	1	1
A_1_1	A	A1	5	3
A_1_1	A	A1	10	6
A_1_1	A	A1	6	3
A_1_1	A	A1	4	3
A_1_1	A	A1	5	3
A_1_1	A	A1	4	3
A_1_2	A	A1	11	5
A_1_2	A	A1	17	6
A_1_2	A	A1	8	5
A_1_2	A	A1	19	6
A_1_2	A	A1	7	6
A_1_2	A	A1	2	2
A_1_2	A	A1	9	5
A_1_2	A	A1	3	2
A_1_2	A	A1	7	5
A_1_2	A	A1	4	4
A_1_2	A	A1	2	2
A_1_3	A	A1	12	5
A_1_3	A	A1	12	4
A_1_3	A	A1	6	4
A_1_3	A	A1	9	3
A_1_3	A	A1	2	1
A_1_3	A	A1	9	4
A_1_3	A	A1	15	5
A_1_3	A	A1	6	4
A_1_3	A	A1	9	6
A_1_3	A	A1	2	2
A_1_3	A	A1	2	1
A_1_4	A	A1	11	7
A_1_4	A	A1	11	6
A_1_4	A	A1	10	7
A_1_4	A	A1	7	4
A_1_4	A	A1	3	3
A_1_4	A	A1	6	3
A_1_4	A	A1	11	3
A_1_4	A	A1	5	3
A_1_4	A	A1	1	1
A_1_4	A	A1	7	3
A_1_4	A	A1	0	0
A_1_5	A	A1	17	5
A_1_5	A	A1	13	6
A_1_5	A	A1	7	4
A_1_5	A	A1	5	5
A_1_5	A	A1	3	3
A_1_5	A	A1	3	3
A_1_5	A	A1	10	4
A_1_5	A	A1	7	2
A_1_5	A	A1	1	1
A_1_5	A	A1	1	1
A_1_5	A	A1	0	0
A_2_1	A	A2	19	5
A_2_1	A	A2	11	7
A_2_1	A	A2	8	3
A_2_1	A	A2	3	2
A_2_1	A	A2	2	2
A_2_1	A	A2	1	1
A_2_1	A	A2	8	5
A_2_1	A	A2	3	2
A_2_1	A	A2	2	2
A_2_1	A	A2	2	2
A_2_1	A	A2	0	0
A_2_2	A	A2	16	5
A_2_2	A	A2	10	5
A_2_2	A	A2	24	6
A_2_2	A	A2	5	5
A_2_2	A	A2	2	2
A_2_2	A	A2	4	3
A_2_2	A	A2	5	5
A_2_2	A	A2	5	3
A_2_2	A	A2	5	5
A_2_2	A	A2	5	5
A_2_2	A	A2	1	1
A_2_3	A	A2	13	4
A_2_3	A	A2	5	4
A_2_3	A	A2	3	3
A_2_3	A	A2	9	5
A_2_3	A	A2	1	1
A_2_3	A	A2	3	3
A_2_3	A	A2	8	3
A_2_3	A	A2	3	2
A_2_3	A	A2	4	2
A_2_3	A	A2	2	1
A_2_3	A	A2	0	0
A_2_4	A	A2	11	4
A_2_4	A	A2	15	6
A_2_4	A	A2	4	4
A_2_4	A	A2	2	2
A_2_4	A	A2	3	3
A_2_4	A	A2	2	2
A_2_4	A	A2	7	3
A_2_4	A	A2	4	3
A_2_4	A	A2	1	1
A_2_4	A	A2	2	2
A_2_4	A	A2	0	0
A_2_5	A	A2	10	4
A_2_5	A	A2	11	6
A_2_5	A	A2	4	3
A_2_5	A	A2	10	6
A_2_5	A	A2	2	1
A_2_5	A	A2	4	4
A_2_5	A	A2	4	4
A_2_5	A	A2	6	3
A_2_5	A	A2	2	2
A_2_5	A	A2	4	3
A_2_5	A	A2	0	0
A_1_1	A	A3	6	3
A_1_1	A	A3	2	2
A_1_1	A	A3	1	1
A_1_1	A	A3	3	1
A_1_1	A	A3	2	2
A_1_1	A	A3	3	3
A_1_1	A	A3	7	3
A_1_1	A	A3	9	4
A_1_1	A	A3	5	2
A_1_1	A	A3	2	1
A_1_1	A	A3	3	2
A_1_2	A	A3	8	2
A_1_2	A	A3	4	1
A_1_2	A	A3	7	1
A_1_2	A	A3	2	1
A_1_2	A	A3	1	1
A_1_2	A	A3	3	2
A_1_2	A	A3	12	6
A_1_2	A	A3	7	2
A_1_2	A	A3	6	4
A_1_2	A	A3	3	3
A_1_2	A	A3	1	1
A_1_3	A	A3	2	2
A_1_3	A	A3	3	2
A_1_3	A	A3	4	1
A_1_3	A	A3	3	3
A_1_3	A	A3	2	2
A_1_3	A	A3	5	4
A_1_3	A	A3	4	2
A_1_3	A	A3	8	4
A_1_3	A	A3	5	1
A_1_3	A	A3	1	1
A_1_3	A	A3	1	1
A_1_4	A	A3	0	0
A_1_4	A	A3	1	1
A_1_4	A	A3	5	2
A_1_4	A	A3	3	2
A_1_4	A	A3	3	3
A_1_4	A	A3	3	3
A_1_4	A	A3	7	3
A_1_4	A	A3	1	1
A_1_4	A	A3	2	2
A_1_4	A	A3	5	3
A_1_4	A	A3	1	1
A_1_5	A	A3	0	0
A_1_5	A	A3	0	0
A_1_5	A	A3	8	4
A_1_5	A	A3	5	3
A_1_5	A	A3	5	4
A_1_5	A	A3	0	0
A_1_5	A	A3	2	2
A_1_5	A	A3	0	0
A_1_5	A	A3	0	0
A_1_5	A	A3	5	4
A_1_5	A	A3	0	0
A_2_1	A	A4	5	3
A_2_1	A	A4	8	3
A_2_1	A	A4	0	0
A_2_1	A	A4	4	3
A_2_1	A	A4	6	6
A_2_1	A	A4	2	2
A_2_1	A	A4	1	1
A_2_1	A	A4	5	3
A_2_1	A	A4	4	3
A_2_1	A	A4	3	1
A_2_1	A	A4	2	2
A_2_2	A	A4	6	2
A_2_2	A	A4	5	4
A_2_2	A	A4	2	1
A_2_2	A	A4	2	2
A_2_2	A	A4	8	7
A_2_2	A	A4	3	3
A_2_2	A	A4	1	1
A_2_2	A	A4	9	4
A_2_2	A	A4	3	1
A_2_2	A	A4	6	2
A_2_2	A	A4	0	0
A_2_3	A	A4	7	3
A_2_3	A	A4	5	2
A_2_3	A	A4	6	1
A_2_3	A	A4	2	2
A_2_3	A	A4	4	2
A_2_3	A	A4	4	3
A_2_3	A	A4	2	2
A_2_3	A	A4	0	0
A_2_3	A	A4	13	3
A_2_3	A	A4	5	3
A_2_3	A	A4	4	2
A_2_4	A	A4	2	2
A_2_4	A	A4	2	2
A_2_4	A	A4	8	3
A_2_4	A	A4	5	2
A_2_4	A	A4	6	4
A_2_4	A	A4	2	2
A_2_4	A	A4	2	2
A_2_4	A	A4	4	3
A_2_4	A	A4	5	3
A_2_4	A	A4	0	0
A_2_4	A	A4	1	1
A_2_5	A	A4	3	2
A_2_5	A	A4	18	2
A_2_5	A	A4	7	3
A_2_5	A	A4	1	1
A_2_5	A	A4	1	1
A_2_5	A	A4	3	3
A_2_5	A	A4	8	3
A_2_5	A	A4	19	4
A_2_5	A	A4	5	3
A_2_5	A	A4	2	1
A_2_5	A	A4	4	3

## Sheet: ecology
Combination; Forest age	Forest age	Shannon H'	Pielou J'	MIB	Eu	F	Oa	Wet	H	Xe	M	Hz	Lz	Sz	Ab	Sb	B	D	Ma	Shannon H'	MIB
C	80	0.669	0.791	237.06	9	26	0	0	0	0	35	1	15	19	19	16	14	2	19	0.669	237.06
C	80	0.704	0.632	409.1	10	76	3	0	0	3	86	1	77	11	72	17	72	5	12	0.704	409.1
C	80	0.853	0.894	211.2	13	22	0	0	0	0	35	0	22	13	31	4	17	10	8	0.853	211.2
C	80	0.763	0.799	253.3	8	42	2	0	3	0	49	2	27	23	31	21	26	6	20	0.763	253.3
C	80	0.531	0.557	449.3	3	62	0	0	0	0	65	4	57	4	56	9	54	0	11	0.531	449.3
C	80	0.68	0.653	416.9	8	54	1	0	5	0	58	1	51	11	50	13	47	4	12	0.68	416.9
C	80	0.863	0.863	274.2	15	35	5	1	3	0	53	0	39	17	42	14	33	9	14	0.863	274.2
C	80	0.747	0.827	280.2	8	25	0	0	0	0	33	3	21	9	18	15	16	4	13	0.747	280.2
C	80	0.466	0.773	370.9	2	10	1	0	0	0	13	0	10	3	10	3	8	2	3	0.466	370.9
C	80	0.65	0.719	486.6	4	32	0	0	0	0	36	2	32	2	31	5	32	0	4	0.65	486.6
C	80	0.572	0.819	325.6	3	20	0	0	6	0	17	0	15	8	17	6	14	3	6	0.572	325.6
C	80	0.766	0.803	411.4	11	30	0	0	0	0	41	0	39	2	34	7	29	6	6	0.766	411.4
C	80	0.525	0.525	459.5	2	51	3	0	0	0	56	2	47	7	50	6	49	0	7	0.525	459.5
C	80	0.962	0.863	255.6	4	41	2	2	4	0	45	2	27	20	27	22	23	3	23	0.962	255.6
C	80	0.71	0.786	316.8	5	26	0	0	0	0	31	1	22	8	22	9	16	4	11	0.71	316.8
C	80	0.695	0.728	344.7	4	27	2	2	2	0	33	3	27	5	29	6	24	4	7	0.695	344.7
C	80	0.792	0.792	396	10	33	0	1	2	0	42	1	39	4	38	6	30	6	8	0.792	396
C	80	0.846	0.846	268.7	12	21	6	1	1	0	39	0	28	12	31	9	22	10	8	0.846	268.7
C	80	0.566	0.626	450	7	31	1	0	0	0	39	1	36	2	33	6	30	4	5	0.566	450
C	80	0.845	0.935	219.8	4	13	5	0	0	0	22	0	11	11	16	6	16	1	5	0.845	219.8
B	43	0.824	0.912	292.912	13	20	1	0	2	0	32	0	28	6	21	13	16	7	11	0.824	292.912
B	43	0.603	0.863	326.676	8	29	0	0	0	0	37	0	34	3	32	5	16	6	15	0.603	326.676
B	43	0.527	0.583	416.909	8	67	0	2	2	0	75	0	73	4	69	8	53	6	18	0.527	416.909
B	43	0.596	0.706	358.848	3	30	0	0	1	0	32	0	30	3	27	6	18	0	15	0.596	358.848
B	43	0.532	0.589	411.119	5	62	0	0	3	0	64	1	60	6	57	10	45	2	20	0.532	411.119
B	43	0.793	0.793	240	16	33	0	1	2	0	48	0	35	15	30	20	18	12	20	0.793	240
B	43	0.614	0.726	332.906	3	28	1	0	1	0	31	0	22	10	21	11	17	2	13	0.614	332.906
B	43	0.685	0.685	394.408	14	55	0	2	3	0	68	0	64	7	54	17	52	5	14	0.685	394.408
B	43	0.758	0.758	314.969	14	51	0	0	1	0	64	1	52	12	50	15	33	13	19	0.758	314.969
B	43	0.79	0.875	338.422	18	27	0	0	0	0	45	1	39	5	27	18	29	6	10	0.79	338.422
B	48	0.794	0.879	225.122	14	34	1	0	0	0	49	0	36	13	33	16	12	9	28	0.794	225.122
B	48	0.831	0.871	245	14	23	2	0	0	1	38	1	27	11	30	9	14	8	17	0.831	245
B	48	0.784	0.784	224.407	19	38	2	0	0	0	59	1	46	12	48	11	14	12	33	0.784	224.407
B	48	0.888	0.853	229.048	11	28	2	1	1	0	41	1	24	17	32	10	16	6	20	0.888	229.048
B	48	0.853	0.853	223.019	20	31	2	0	0	0	53	2	35	16	42	11	16	11	26	0.853	223.019
B	48	0.817	0.817	179.979	15	32	1	0	0	0	48	1	28	19	32	16	10	11	27	0.817	179.979
B	48	0.836	0.802	199.312	20	40	4	0	1	0	63	0	44	20	50	14	14	12	38	0.836	199.312
B	48	0.827	0.766	194.952	38	43	3	0	0	1	83	2	59	23	70	14	15	25	44	0.827	194.952
B	48	0.847	0.847	236.319	30	41	1	0	0	0	72	1	52	19	62	10	21	17	34	0.847	236.319
B	48	0.737	0.643	349.089	15	85	0	1	3	0	98	1	92	8	91	10	44	11	46	0.737	349.089
A	28	0.927	0.809	185.218	0	67	11	0	0	13	65	3	34	41	50	28	53	2	23	0.927	185.218
A	28	0.879	0.789	221.989	2	82	5	0	0	17	72	3	49	37	59	30	61	3	25	0.879	221.989
A	28	0.868	0.804	174.786	0	80	4	0	0	12	72	4	40	40	53	31	45	3	36	0.868	174.786
A	28	0.925	0.83	215.25	2	65	4	1	1	11	60	0	38	34	45	27	48	2	22	0.925	215.25
A	28	0.789	0.827	178.149	0	66	1	0	0	12	55	0	30	37	44	23	49	4	14	0.789	178.149
A	28	0.838	0.804	206.288	0	56	2	1	1	14	44	0	30	29	34	25	44	1	14	0.838	206.288
A	28	0.949	0.771	157.354	0	76	6	0	0	15	67	3	32	47	43	39	46	4	32	0.949	157.354
A	28	0.793	0.793	200	0	44	7	0	0	4	47	1	22	28	42	9	36	2	13	0.793	200
A	28	0.831	0.831	180.863	0	47	4	0	0	6	45	0	22	29	32	19	33	1	17	0.831	180.863
A	28	0.862	0.862	185.93	0	54	3	0	0	9	48	2	28	27	40	17	38	2	17	0.862	185.93
A	28	0.737	0.737	376.93	11	31	0	1	4	0	39	0	38	5	33	10	30	3	10	0.737	376.93
A	28	0.599	0.628	428.556	10	42	0	2	2	0	52	0	51	3	44	10	43	3	8	0.599	428.556
A	28	0.631	0.662	376.974	3	32	0	3	4	0	34	0	31	7	31	7	26	2	10	0.631	376.974
A	28	0.658	0.728	339.129	0	29	0	2	4	0	27	1	26	4	25	6	17	0	14	0.658	339.129
A	28	0.829	0.829	299.36	3	20	1	1	4	0	21	1	16	8	15	10	14	1	10	0.829	299.36
A	28	0.81	0.81	308.875	9	29	0	2	2	0	38	1	33	6	30	10	22	6	12	0.81	308.875
A	28	0.823	0.912	276.444	15	30	0	0	1	0	44	0	36	9	28	17	21	7	17	0.823	276.444
A	28	0.572	0.599	406.25	4	45	0	3	4	0	48	0	44	8	38	14	40	1	11	0.572	406.25
A	28	0.625	0.655	404.054	5	31	0	1	1	0	36	1	35	1	31	6	26	2	9	0.625	404.054
A	28	0.692	0.725	353.972	9	59	0	3	5	0	66	1	62	8	55	16	42	5	24	0.692	353.972
